# Supplementary material for: Molecular Machines in the Synapse: Overlapping Protein Sets Control Distinct Steps in Neurosecretion
Source: PubMed Central journal article supplement (PMC3320570; doi:10.1371/journal.pcbi.1002450), 2012-04-05
Supplement: pcbi.1002450.s003.pdf [file pcbi.1002450.s003.pdf]

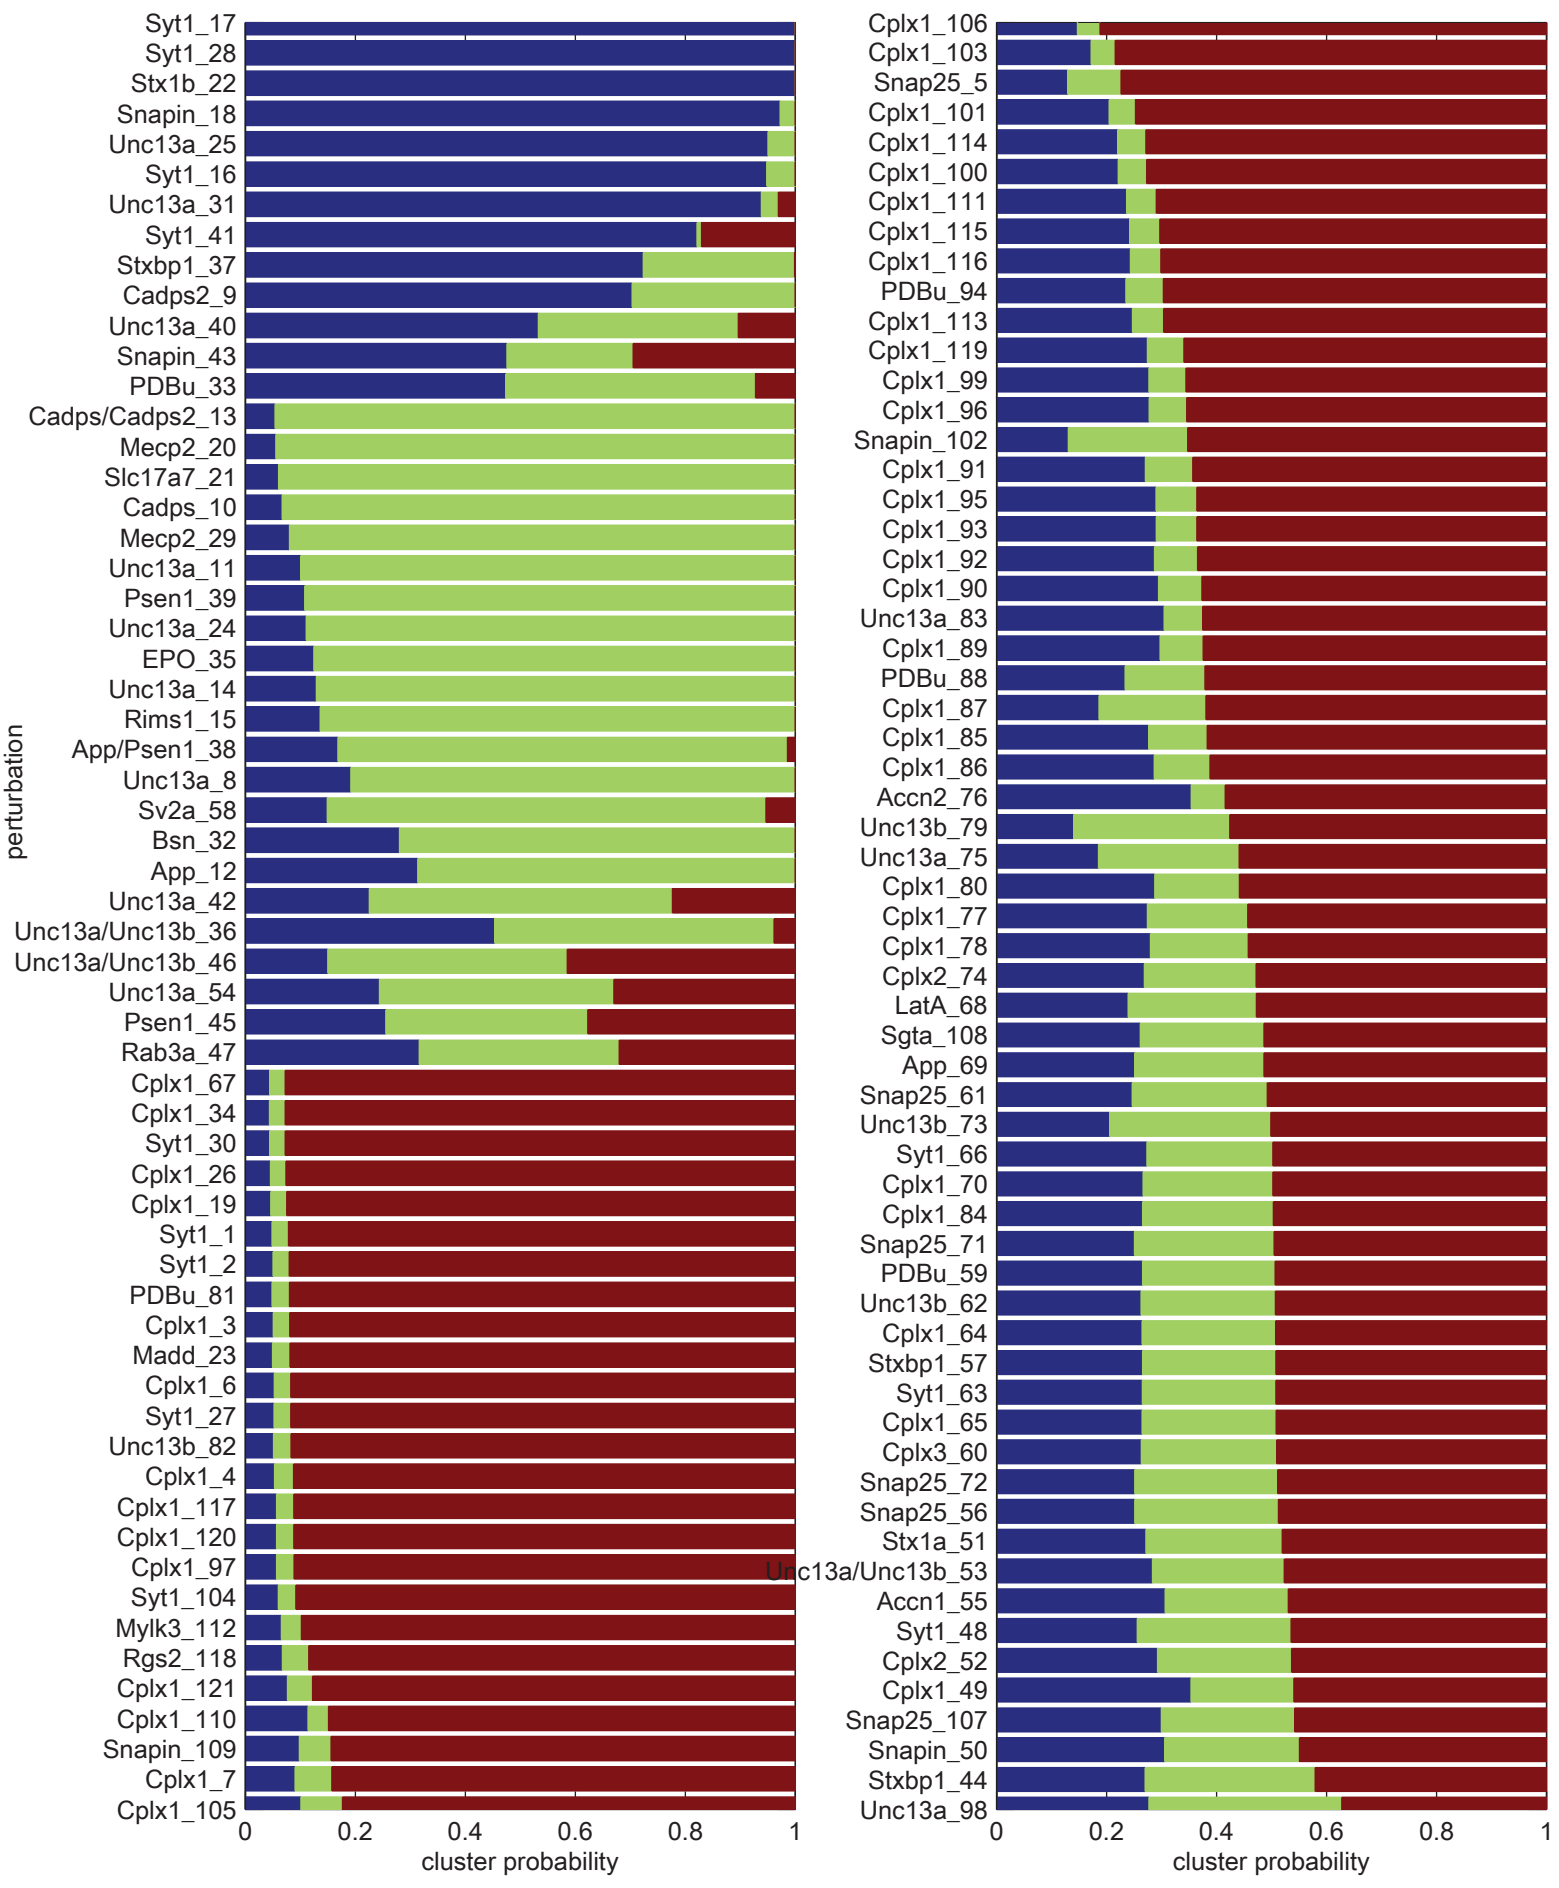

Figure S3 Cornelisse et al.
