# Supplementary material for: Molecular Machines in the Synapse: Overlapping Protein Sets Control Distinct Steps in Neurosecretion
Source: PLoS Comput Biol. 2012 Apr 5;8(4):e1002450. doi: 10.1371/journal.pcbi.1002450 (PMC3320570; doi:10.1371/journal.pcbi.1002450)
Supplement: Table S3 — Excel file with correlation model fits: (A) Weighted orthogonal errors (not corrected and corrected for the average probability) for fits to the different correlation models (0, 45, 90, 135 degrees) in the 2D projections of the evoked release variable space plotted in Figure 4A. The average probability of all data points shown in a particular subspace (this may vary between subspaces because not all variables are reported for all subspaces) are given for each subspace and cluster. (B) Idem for the correlation between the spontaneous release variable F and the evoked release variables as plotted in Figure 4B. (XLS) [file pcbi.1002450.s010.xls]

## Sheet: Sheet1
	A. Weighted orthogonal errors for different correlation models for evoked release variables A, RRP, Pv (Fig. 2A)
		No clustering					Cluster 1 (Pv)					Cluster 2 (RRP)					Cluster 3 (RRP-1/Pv)						Summed error best fits data cluster 1-3	Error best fits non clustered data
		0	45	90	135	Average probability	0	45	90	135	Average probability	0	45	90	135	Average probability	0	45	90	135	Average probability
	A-RRP	2.53408	0.3032	1.18563	3.41651	1	0.360183	0.136497	0.0426766	0.266362	0.421324	1.21492	0.0890498	0.717959	1.84383	0.298636	0.958962	0.0776519	0.42499	1.3063	0.28004		0.209378	0.3032
	A-Pv	0.478808	0.136864	0.246005	0.587949	1	0.222684	0.00846277	0.186468	0.400689	0.462772	0.214925	0.100013	0.0166487	0.13156	0.263913	0.0411992	0.028388	0.0428892	0.0557004	0.273315		0.0534995	0.136864
	RRP-Pv	0.186636	0.272035	0.319816	0.234418	1	0.00660649	0.135141	0.260879	0.132344	0.53077	0.153245	0.089169	0.0164185	0.0804942	0.206211	0.0267849	0.0477248	0.0425193	0.0215793	0.26302		0.0446043	0.186636
																						Total error	0.307482	0.6267
																						% of non-cl.	49.0637	100
		Corrected for average probability
		0	45	90	135		0	45	90	135		0	45	90	135		0	45	90	135
	A-RRP	2.53408	0.3032	1.18563	3.41651		0.854883	0.323971	0.101292	0.632202		4.06823	0.298188	2.40413	6.17417		3.42438	0.277289	1.51761	4.66469			0.225589	0.3032
	A-Pv	0.478808	0.136864	0.246005	0.587949		0.481196	0.0182871	0.402937	0.865845		0.814379	0.378962	0.0630841	0.498498		0.150739	0.103865	0.156922	0.203795			0.0617456	0.136864
	RRP-Pv	0.186636	0.272035	0.319816	0.234418		0.012447	0.254613	0.491511	0.249344		0.743145	0.432415	0.0796197	0.390348		0.101836	0.18145	0.161658	0.0820445			0.0580371	0.186636
																						Total error	0.345372	0.6267
																						% of non-cl.	55.1096	100
	B. Weighted orthogonal errors for different correlation models for spontaneous and evoked release variables F, A, RRP, Pv (Fig. 2B)
		No clustering					Cluster 1 (Pv)					Cluster 2 (RRP)					Cluster 3 (RRP-1/Pv)
		0	45	90	135	Average probability	0	45	90	135	Average probability	0	45	90	135	Average probability	0	45	90	135	Average probability
	A-F	3.62309	0.630945	7.67402	10.6662	0.483974	0.424568	0.178728	0.61998	0.86582	0.142725	1.81343	0.237272	3.90089	5.47706	0.217075	1.38507	0.214945	3.15311	4.32324	0.124175
	RRP-F	1.1593	1.0258	5.45078	5.58428	0.38615	0.0410811	0.15854	0.474869	0.35741	0.134035	0.677389	0.447535	2.67773	2.90759	0.152219	0.440823	0.419721	2.29815	2.31925	0.0998965
	Pv-F	0.263746	0.347617	0.702158	0.618287	0.375	0.196623	0.14053	0.238537	0.29463	0.130089	0.0157255	0.164872	0.367535	0.218389	0.157241	0.0513982	0.0422145	0.0960858	0.10527	0.08767
		Corrected for average probability
		0	45	90	135		0	45	90	135		0	45	90	135		0	45	90	135
	A-F	7.48612	1.30367	15.8563	22.0388		2.97474	1.25226	4.34389	6.06637		8.35394	1.09304	17.9703	25.2312		11.1542	1.73098	25.3925	34.8157
	RRP-F	3.0022	2.65648	14.1157	14.4614		0.306496	1.18283	3.54288	2.66654		4.45009	2.94007	17.5913	19.1014		4.4128	4.20156	23.0053	23.2165
	Pv-F	0.703323	0.926979	1.87242	1.64877		1.51145	1.08026	1.83364	2.26483		0.100009	1.04853	2.3374	1.38888		0.586269	0.481516	1.09599	1.20075
