# Supplementary material for: Molecular Machines in the Synapse: Overlapping Protein Sets Control Distinct Steps in Neurosecretion
Source: PLoS Comput Biol. 2012 Apr 5;8(4):e1002450. doi: 10.1371/journal.pcbi.1002450 (PMC3320570; doi:10.1371/journal.pcbi.1002450)
Supplement: Table S4 — Excel file with the average cluster probabilities per gene calculated from the probabilities of the individual perturbations. (XLS) [file pcbi.1002450.s011.xls]

## Sheet: All perturbations RMS>0.2
General information								Indices			Normalized synaptic parameters				Log2 transformed ratios and SEMs								Cluster probabilities					Entropy & RMS
Author	Pubmed ID	Gene/Compound	Alias in Paper	Full name	Gene family	Perturbation	Normalized to	Perturbation index	Normalized to index	Index Cooc. matrix	Ap/Ac	RRPp/RRPc	Pv,p/Pv,c	Fp/Fc	log2(Ap/Ac)	log2(Ap/Ac) SEM	log2(RRPp/RRPc)	log2(RRPp/RRPc) SEM	log2(Pv,p/Pv,c)	log2(Pv,p/Pv,c) SEM	log2(Fp/Fc)	log2(Fp/Fc) SEM	P Cl1	P Cl2	P Cl3	P nonclustered	Winning Cl	Entropy	RMS
"Cho 2008"	18094106	"Accn2"	"ASIC1"	"amiloride-sensitive cation channel 2"	"Accn"	"ASIC1 KO"	"WT"	59	58	76	1.17534	0.830287	1.55714	Nan	0.233081	0.277672	-0.268318	0.343442	0.638901	0.278951	Nan	0	0.58425	0.062034	0.35371	1	1	0.854053	0.422104
"Priller 2006"	16822978	"App"		"amyloid beta (A4) precursor protein"	"App"	"APP KO "	"WT"	165	164	12	1.7382	3.05037	Nan	2.375	0.797592	0.229995	1.60899	0.349477	Nan	0	1.24793	0.341724	-7.5099e-30	0.68643	0.31357	1	2	0.621927	1.26984
"Priller 2009"	18077058	"App/Psen1"	"App/PS1"	"amyloid beta (A4) precursor protein/presenilin 1"	"App/Psen1"	"APP/PS1 KI (human PS and APP)"	"WT"	182	181	38	0.770492	0.439024	1.16514	0.737841	-0.376148	0.14408	-1.18763	0.397628	0.2205	0.318992	-0.438618	0.368295	0.014409	0.81729	0.1683	1	2	0.525902	0.730426
"Altrock 2003"	12628169	"Bsn"		"bassoon"	"Bsn"	"Bassoon KO "	"WT "	6	5	32	0.536232	0.525683	1.31481	Nan	-0.899071	0.408226	-0.927735	0.380346	0.39486	0.226469	Nan	0	-1.1079e-32	0.72004	0.27996	1	2	0.592916	0.779943
"Jockusch 2007"	18022372	"Cadps"	"CAPS-1"	"Ca2+-dependent secretion activator"	"Cadps"	"CAPS1 KO"	"WT"	104	103	10	0.515152	0.422222	0.824623	0.444444	-0.956931	0.121848	-1.24393	0.198765	-0.278194	0.122102	-1.16993	0.394692	-7.851e-31	0.93353	0.066471	1	2	0.244412	0.920228
"Jockusch 2007"	18022372	"Cadps/Cadps2"	"CAPS-1/CAPS-2"	"Ca2+-dependent secretion activator/Ca2+-dependent activator protein for secretion 2"	"Cadps"	"CAPS1_2 DKO"	"WT"	106	103	13	0.272727	0.133333	0.963995	0.2	-1.87447	0.182595	-2.90689	0.497703	-0.0529019	0.121858	-2.32193	0.288984	-2.7562e-31	0.94597	0.05403	1	2	0.210215	1.9972
"Jockusch 2007"	18022372	"Cadps2"	"CAPS-2"	"Ca2+-dependent activator protein for secretion 2"	"Cadps"	"CAPS2 KO"	"WT"	105	103	9	0.818182	0.866667	1.14983	0.851852	-0.289507	0.10247	-0.206451	0.195806	0.201415	0.0586748	-0.231326	0.247198	-9.7218e-31	0.2966	0.7034	1	3	0.607956	0.235941
"Reim 2001"	11163241	"Cplx1"	"Cpx1"	"complexin 1"	"Cplx"	"Cpx I/II DKO"	"Cpx II KO"	187	188	19	0.347826	1.02703	0.468085	0.987013	-1.52356	0.177971	0.0384741	0.255216	-1.09516	0.134451	-0.018859	0.0732139	0.92476	0.029412	0.045826	1	1	0.31733	1.08353
"Xue 2007"	17828276	"Cplx1"	"Cpx1"	"complexin 1"	"Cplx"	"Cpx 1_2 DKO "	"Cpx 1_2 DKO + Cpx 1 WT (normalized to WT OE) (imputed for calculations)"	319	313	115	Nan	1	0.550134	Nan	Nan	0	0	0.641483	-0.862145	0.0674945	Nan	0	0.70327	0.054987	0.24174	1	1	0.750304	0.609629
"Xue 2007"	17828276	"Cplx1"	"Cpx1"	"complexin 1"	"Cplx"	"Cpx 1_2 DKO + Cpx 1 WT (47-134)"	"Cpx 1_2 DKO + Cpx 1 WT"	312	310	90	Nan	1	0.781457	Nan	Nan	0	0	0.641483	-0.355762	0.113028	Nan	0	0.62667	0.078893	0.29444	1	1	0.853232	0.251562
"Xue 2007"	17828276	"Cplx1"	"Cpx1"	"complexin 1"	"Cplx"	"Cpx 1_2 DKO + Cpx 1 WT"	"Cpx 1_2 DKO"	309	308	7	2.44211	1.16899	1.8	Nan	1.28813	0.224881	0.225265	0.234162	0.847997	0.15389	Nan	0	0.84262	0.066904	0.09048	1	1	0.542621	0.899835
"Xue 2007"	17828276	"Cplx1"	"Cpx1"	"complexin 1"	"Cplx"	"Cpx 1_2 DKO + Cpx 1 WT(47-75) "	"Cpx 1_2 DKO + Cpx 1 WT"	311	310	96	Nan	1	0.675497	Nan	Nan	0	0	0.641483	-0.565979	0.153618	Nan	0	0.65438	0.068294	0.27733	1	1	0.816486	0.400208
"Xue 2007"	17828276	"Cplx1"	"Cpx1"	"complexin 1"	"Cplx"	"Cpx 1_2 DKO + CPX1 (27-134) L41P "	"Cpx 1_2 DKO + Cpx 1 WT (normalized to WT OE) (imputed for calculations)"	321	313	95	Nan	1	0.746381	Nan	Nan	0	0	0.641483	-0.422016	0.105715	Nan	0	0.63609	0.074014	0.2899	1	1	0.839432	0.298411
"Xue 2007"	17828276	"Cplx1"	"Cpx1"	"complexin 1"	"Cplx"	"Cpx 1_2 DKO + CPX1 (41-134) "	"Cpx 1_2 DKO + Cpx 1 WT (normalized to WT OE) (imputed for calculations)"	322	313	93	Nan	1	0.749598	Nan	Nan	0	0	0.641483	-0.415811	0.0804937	Nan	0	0.6358	0.073923	0.29027	1	1	0.839533	0.294023
"Xue 2007"	17828276	"Cplx1"	"Cpx1"	"complexin 1"	"Cplx"	"Cpx 1_2 DKO + CPX1 (47-134) "	"Cpx 1_2 DKO + Cpx 1 WT (normalized to WT OE) (imputed for calculations)"	323	313	89	Nan	1	0.801072	Nan	Nan	0	0	0.641483	-0.319995	0.0811154	Nan	0	0.62454	0.078337	0.29712	1	1	0.85409	0.226271
"Xue 2007"	17828276	"Cplx1"	"Cpx1"	"complexin 1"	"Cplx"	"Cpx 1_2 DKO + CPX1K69A Y70A "	"Cpx 1_2 DKO + Cpx 1 WT (normalized to WT OE) (imputed for calculations)"	317	313	111	Nan	1	0.532987	Nan	Nan	0	0	0.641483	-0.907828	0.109679	Nan	0	0.70971	0.053945	0.23635	1	1	0.741788	0.641931
"Xue 2007"	17828276	"Cplx1"	"Cpx1"	"complexin 1"	"Cplx"	"Cpx 1_2 DKO + CPX1R48L R59H "	"Cpx 1_2 DKO + Cpx 1 WT (normalized to WT OE) (imputed for calculations)"	316	313	119	Nan	1	0.660779	Nan	Nan	0	0	0.641483	-0.59776	0.142908	Nan	0	0.65961	0.066403	0.27399	1	1	0.809279	0.42268
"Xue 2007"	17828276	"Cplx1"	"Cpx1"	"complexin 1"	"Cplx"	"Cpx 1_2 DKO + CPX1R59H "	"Cpx 1_2 DKO + Cpx 1 WT (normalized to WT OE) (imputed for calculations)"	315	313	86	Nan	1	0.763636	Nan	Nan	0	0	0.641483	-0.389042	0.188434	Nan	0	0.6118	0.1014	0.2868	1	1	0.890885	0.275094
"Xue 2007"	17828276	"Cplx1"	"Cpx1"	"complexin 1"	"Cplx"	"Cpx 1_2 DKO"	"Cpx 2 KO"	308	307	4	0.437788	0.961252	0.542636	Nan	-1.1917	0.23274	-0.0570136	0.245588	-0.881944	0.146357	Nan	0	0.91225	0.034854	0.052896	1	1	0.356257	0.856585
"Xue 2007"	17828276	"Cplx1"	"Cpx1"	"complexin 1"	"Cplx"	"Cpx 1_2 DKO"	"Cpx 1_2 DKO + Cpx 1 WT (normalized to WT OE) (imputed for calculations)"	320	313	113	Nan	1	0.56622	Nan	Nan	0	0	0.641483	-0.820566	0.0737742	Nan	0	0.69645	0.056416	0.24713	1	1	0.759592	0.580228
"Xue 2007"	17828276	"Cplx1"	"Cpx1"	"complexin 1"	"Cplx"	"Cpx 1_2DKO "	"Cpx 1_2 DKO + Cpx 1 WT (normalized to WT OE) (imputed for calculations)"	318	313	116	Nan	1	0.554805	Nan	Nan	0	0	0.641483	-0.849947	0.0648402	Nan	0	0.70134	0.055363	0.24329	1	1	0.752912	0.601003
"Xue 2007"	17828276	"Cplx1"	"Cpx1"	"complexin 1"	"Cplx"	"Syt1 KO + Cpx1(27-134) (disrupts Cpx function but not SNARE binding)"	"Syt1 KO + Cpx1 WT "	331	330	105	0.319403	Nan	0.457237	Nan	-1.64655	0.39285	Nan	0	-1.12899	0.201371	Nan	0	0.82362	0.075452	0.10092	1	1	0.58626	1.41169
"Xue 2007"	17828276	"Cplx1"	"Cpx1"	"complexin 1"	"Cplx"	"WT + Cpx1(27-134)"	"WT + Cpx1 WT (imputed for calculations)"	325	324	99	Nan	1	0.676364	Nan	Nan	0	0	0.641483	-0.564129	0.10859	Nan	0	0.65564	0.067338	0.27702	1	1	0.814055	0.398899
"Xue 2008"	18505837	"Cplx1"	"Cpx1"	"complexin 1"	"Cplx"	"Cpx1_2 DKO"	"Control (Cpx2-/-_ 3+/+_+/-_-/-)"	337	336	34	0.297994	1.02439	0.453052	0.659091	-1.74664	0.163362	0.0347654	0.147522	-1.14225	0.147308	-0.601451	0.198684	0.92772	0.028197	0.044087	1	1	0.307846	1.20509
"Xue 2008"	18505837	"Cplx1"	"Cpx1"	"complexin 1"	"Cplx"	"Cpx1_2_3 TKO"	"Control (Cpx2-/-_ 3+/+_+/-_-/-)"	339	338	67	0.34957	0.977011	0.464789	0.673469	-1.51635	0.16839	-0.0335526	0.142374	-1.10535	0.157216	-0.570316	0.210832	0.92777	0.02802	0.044215	1	1	0.307616	1.08355
"Xue 2009"	19914185	"Cplx1"	"Cpx1"	"complexin 1"	"Cplx"	"Cplx1_2_3 TKO + Cplx1 1-47-dmCplx 54-143"	"Cplx1_2_3 TKO"	370	369	110	Nan	1	0.266727	0.265976	Nan	0	0	0.641483	-1.90656	0.219125	-1.91063	0.39878	0.8487	0.037392	0.1139	1	1	0.50955	1.34814
"Xue 2009"	19914185	"Cplx1"	"Cpx1"	"complexin 1"	"Cplx"	"Cplx1_2_3 TKO + Cplx1 16-134"	"Cplx1_2_3 TKO + Cplx1 wt"	377	376	103	Nan	1	0.378698	0.12	Nan	0	0	0.641483	-1.40088	0.200552	-3.05889	0.316306	0.78449	0.043785	0.17172	1	1	0.629944	0.990571
"Xue 2009"	19914185	"Cplx1"	"Cpx1"	"complexin 1"	"Cplx"	"Cplx1_2_3 TKO + Cplx11-15-dmCplx 17-143"	"Cplx1_2_3 TKO"	374	373	120	Nan	1	0.0316456	0.0621762	Nan	0	0	0.641483	-4.98185	0.661228	-4.00749	0.491493	0.91175	0.031578	0.056672	1	1	0.356023	3.5227
"Xue 2009"	19914185	"Cplx1"	"Cpx1"	"complexin 1"	"Cplx"	"Cplx1_2_3 TKO + Cpx1 (mouse WT cpx1)"	"Cplx1_2_3 TKO"	352	351	101	Nan	1	2.21658	1.51712	Nan	0	0	0.641483	1.14834	0.144362	0.601338	0.180977	0.74748	0.048118	0.20441	1	1	0.688074	0.811997
"Xue 2009"	19914185	"Cplx1"	"Cpx1"	"complexin 1"	"Cplx"	"Cplx1_2_3 TKO + dmCplx 1-76-Cplx3 81-158"	"Cplx1_2_3 TKO"	366	365	100	Nan	1	2.04073	0.969589	Nan	0	0	0.641483	1.02908	0.17457	-0.0445554	0.324633	0.72711	0.051313	0.22158	1	1	0.718018	0.727672
"Xue 2009"	19914185	"Cplx1"	"Cpx1"	"complexin 1"	"Cplx"	"Cplx1_2_3 TKO + dmCplx 1-83"	"Cplx1_2_3 TKO"	360	359	85	Nan	1	0.701906	1.23077	Nan	0	0	0.641483	-0.510649	0.269545	0.29956	0.339552	0.61677	0.10709	0.27615	1	1	0.892661	0.361084
"Xue 2009"	19914185	"Cplx1"	"Cpx1"	"complexin 1"	"Cplx"	"Cplx1_2_3 TKO + dmCplx 17-143"	"Cplx1_2_3 TKO"	372	371	97	Nan	1	0.0361664	0.0587219	Nan	0	0	0.641483	-4.78921	0.573008	-4.08996	0.710553	0.91167	0.031602	0.056733	1	1	0.356269	3.38648
"Xue 2009"	19914185	"Cplx1"	"Cpx1"	"complexin 1"	"Cplx"	"Cplx1_2_3 TKO + dmCplx 54-143"	"Cplx1_2_3 TKO"	368	367	114	Nan	1	0.483725	1.22625	Nan	0	0	0.641483	-1.04774	0.208273	0.294256	0.245828	0.72858	0.051326	0.2201	1	1	0.716286	0.740864
"Xue 2009"	19914185	"Cplx1"	"Cpx1"	"complexin 1"	"Cplx"	"Cplx1_2_3 TKO + dmCplx C140S"	"Cplx1_2_3 TKO"	364	363	92	Nan	1	0.732236	0.783542	Nan	0	0	0.641483	-0.44962	0.161583	-0.351917	0.290666	0.63473	0.078319	0.28695	1	1	0.846238	0.317929
"Xue 2009"	19914185	"Cplx1"	"Cpx1"	"complexin 1"	"Cplx"	"Cplx1_2_3 TKO + dmCpx (drosphila mutant)"	"Cplx1_2_3 TKO + Cpx1 (mouse WT cpx1)"	347	346	6	0.00963855	1.08311	0.00909091	0.0275482	-6.69697	1.10982	0.11518	0.19891	-6.78136	1.08917	-5.1819	0.331372	0.91781	0.029902	0.052288	1	1	0.337968	5.50301
"Xue 2009"	19914185	"Cplx1"	"Cpx1"	"complexin 1"	"Cplx"	"Cplx1_2_3 TKO + dmCpx (drosphila mutant)"	"Cplx1_2_3 TKO"	354	353	121	Nan	1	0.0126904	0.0445205	Nan	0	0	0.641483	-6.30012	2.40972	-4.48938	0.464823	0.87814	0.045201	0.076663	1	1	0.450981	4.45486
"Xue 2009"	19914185	"Cplx1"	"Cpx1"	"complexin 1"	"Cplx"	"Cplx1_2_3 TKO + dmCpx 1-53-Cplx1 48-70-dmCplx 77-143 "	"Cplx1_2_3 TKO"	358	357	117	Nan	1	0.0169205	0.0376712	Nan	0	0	0.641483	-5.88509	1.0945	-4.73039	0.316586	0.91194	0.031483	0.056573	1	1	0.355432	4.16138
"Xue 2009"	19914185	"Cplx1"	"Cpx1"	"complexin 1"	"Cplx"	"Cplx1_2_3 TKO + dmCpx K75A_ Y76A"	"Cplx1_2_3 TKO"	356	355	91	Nan	1	0.651438	0.876712	Nan	0	0	0.641483	-0.6183	0.276315	-0.189825	0.405768	0.64337	0.086228	0.2704	1	1	0.848716	0.437204
"Xue 2009"	19914185	"Cplx1"	"Cpx1"	"complexin 1"	"Cplx"	"Cplx1_2_3 TKO"	"Cplx1_2_3 TKO + Cpx1 (mouse WT cpx1)"	345	346	26	0.373494	1.03485	0.513636	0.603306	-1.42084	0.314844	0.0494252	0.169499	-0.961181	0.212677	-0.729039	0.218075	0.92624	0.028349	0.045412	1	1	0.312395	0.990809
"Xue 2009"	19914185	"Cplx1"	"Cpx1"	"complexin 1"	"Cplx"	"Cplx1_2_3 TKO"	"Cplx1_2_3 TKO + Cplx1 wt"	375	376	106	Nan	1	0.331361	0.651429	Nan	0	0	0.641483	-1.59352	0.198028	-0.618321	0.266119	0.81208	0.040881	0.14703	1	1	0.581614	1.12679
"Xue 2009"	19914185	"Cplx1"	"Cpx1"	"complexin 1"	"Cplx"	"WT+Cpx1"	"WT+EGFP"	349	348	87	0.79902	0.94686	0.874384	0.905941	-0.323697	0.299646	-0.0787771	0.212603	-0.193661	0.216923	-0.142512	0.267308	0.6192	0.19478	0.18602	1	1	0.928304	0.222479
"Xue 2009"	19914185	"Cplx1"	"Cpx1"	"complexin 1"	"Cplx"	"WT+dmCpx"	"WT+EGFP"	350	348	3	0.151961	0.94686	0.135468	0.143564	-2.71823	0.352839	-0.0787771	0.230926	-2.88398	0.328177	-2.80023	0.488917	0.91945	0.029999	0.050555	1	1	0.3333	2.28854
"Adamcio 2008"	18782446	"EPO"		"Erythropoietin"	"EPO"	"WT+10^-4 uM EPO"	"WT"	4	3	35	0.651885	0.609702	1.14326	0.54798	-0.617311	0.18997	-0.713823	0.292546	0.193152	0.206244	-0.867805	0.308084	-1.282e-16	0.87522	0.12478	1	2	0.376342	0.556155
"Morales 2000 "	11055436	"LatA"		"Latrunculin A"	"LatA"	"WT + 20uM Latrunculin"	"WT"	144	143	68	1.25	1.04053	Nan	4.4	0.321928	0.42119	0.0573232	0.218881	Nan	0	2.1375	0.918079	0.52788	0.23292	0.2392	1	1	1.0188	0.231218
"Yamaguchi 2002"	18953334	"Madd"	"Rab3GEP"	"MAP-kinase activating death domain"	"Madd"	"Rab3GEP KO"	"WT"	380	379	23	0.22207	1.04651	0.325	0.702624	-2.17091	0.294975	0.0655883	0.417227	-1.62149	0.490844	-0.509175	0.314492	0.91874	0.031742	0.049523	1	1	0.336211	1.56486
"Chao 2007"	17920015	"Mecp2"		"methyl CpG binding protein 2"	"Mecp2"	"MeCP2 KO"	"WT"	55	54	29	0.545903	0.588511	0.956817	0.624606	-0.873283	0.244983	-0.764858	0.214996	-0.0636854	0.277896	-0.678982	0.155479	1.0806e-33	0.91979	0.080211	1	2	0.279283	0.671239
"Chao 2007"	17920015	"Mecp2"		"methyl CpG binding protein 2"	"Mecp2"	"Tg1 (MeCP2 KI_ double levels of Mecp2) "	"WT"	57	56	20	2.13777	2.05245	0.94621	1.57143	1.09611	0.209572	1.03735	0.270187	-0.0797673	0.12395	0.652077	0.265602	-7.7023e-33	0.94474	0.055264	1	2	0.213729	0.872525
"Tokuoka 2006"	17093082	"Mylk3"	"MLCK"	"myosin light chain kinase 3"	"Mylk"	"WT + 10uM ML-7"	"WT"	246	245	112	0.532374	1.1	0.428571	5	-0.909488	0.396037	0.137504	0.487436	-1.22239	0.31669	2.32193	0.527872	0.8981	0.036393	0.065511	1	1	0.395659	0.883236
"Basu 2007"	17267576	"PDBu"		"4beta -phorbol-12_ 13-dibutyrate"	"PDBu"	"M13-1 WT / M13-2 KO + 1uM PDBU "	"M13-1 WT / M13-2 KO"	19	16	94	Nan	0.995134	1.55263	2.64444	Nan	0	-0.00703755	0.408938	0.634716	0.254135	1.40296	0.317867	0.69692	0.06776	0.23532	1	1	0.774505	0.448839
"Basu 2007"	17267576	"PDBu"		"4beta -phorbol-12_ 13-dibutyrate"	"PDBu"	"M13-1H567K KI / M13-2 KO + 1uM PDBU([M13-1 H567K mimics PDBU activated state)"	"M13-1H567K KI / M13-2 KO (M13-1 H567K mimics PDBU activated state)"	21	18	88	Nan	1.07391	1.26389	1.125	Nan	0	0.102877	0.299993	0.33787	0.22505	0.169925	0.184214	0.62104	0.1453	0.23366	1	1	0.915831	0.249739
"Rosenmund 2002"	11832228	"PDBu"		"4beta -phorbol-12_ 13-dibutyrate"	"PDBu"	"WT + 100-1000nM PBDU"	"before PDBU (imputed for calculations)"	207	205	33	1.99	1.3	Nan	Nan	0.992768	0.181243	0.378512	0.0166465	Nan	0	Nan	0	0.0725	0.45405	0.47345	1	3	0.902749	0.751286
"Rosenmund 2002"	11832228	"PDBu"		"4beta -phorbol-12_ 13-dibutyrate"	"PDBu"	"M13-1 KO + 100-1000nM PBDU"	"before PDBU (imputed for calculations)"	206	205	81	5.7	1.11	Nan	Nan	2.51096	0.298663	0.15056	0.0649863	Nan	0	Nan	0	0.92009	0.031678	0.04823	1	1	0.332208	1.77871
"Priller 2007"	17088253	"Psen1"	"PS1"	"presenilin 1"	"Psen"	" PS1 KI"	"WT "	173	172	45	0.885246	0.653317	1.00236	0.990037	-0.17585	0.260486	-0.614145	0.433466	0.00339858	0.378726	-0.0144451	0.389444	0.37731	0.36757	0.25512	1	1	1.08414	0.368831
"Priller 2007"	17088253	"Psen1"	"PS1"	"presenilin 1"	"Psen"	"non functional PS1 KI "	"WT "	174	172	39	0.590164	0.329288	1.04009	0.37609	-0.760812	0.233387	-1.60258	0.497038	0.0567144	0.540902	-1.41085	0.39245	2.5671e-33	0.89221	0.10779	1	2	0.34187	1.02475
"Schluter 2004"	15269275	"Rab3a"		"RAB3A_ member RAS oncogene family"	"Rab3"	"((Rab3bcd TKO)) Rab3 abcd QKO"	"Rab3 bcd TKO"	213	212	47	0.7	0.828947	Nan	0.927835	-0.514573	0.462817	-0.270648	0.184184	Nan	0	-0.10806	0.230088	0.32019	0.36369	0.31612	1	2	1.09656	0.411118
"Han 2006"	16950156	"Rgs2"		"regulator of G-protein signaling 2"	"Rgs"	"RGS2 KO"	"WT"	102	101	118	0.747356	1.14417	0.751185	0.923885	-0.420132	0.134826	0.194299	0.299197	-0.41276	0.161323	-0.114216	0.0756018	0.88457	0.047895	0.067534	1	1	0.436049	0.358066
"Calakos 2004"	15207234	"Rims1"	"RIM1alpha"	"regulating synaptic membrane exocytosis 1"	"Rims1"	"Rim1 KO"	"WT"	47	46	15	0.539519	0.55	1.25148	0.860382	-0.890255	0.281465	-0.862496	0.174706	0.323634	0.274266	-0.216951	0.597042	-1.282e-16	0.86389	0.13611	1	2	0.397839	0.739638
"Tobaben 2001"	11580898	"Sgta"		"small glutamine-rich tetratricopeptide repeat"	"Sgt"	"WT + SGT"	"WT + GFP"	244	243	108	0.532	0.655172	0.681818	Nan	-0.910502	0.18575	-0.610053	0.291094	-0.552541	0.174612	Nan	0	0.51393	0.22463	0.26144	1	1	1.02828	0.708633
"Wojcik 2004"	15103023	"Slc17a7"	"VGLUT1"	"solute carrier family 17 (sodium-dependent inorganic phosphate cotransporter)_ member 7"	"Slc17a"	"VGLUT1 KO"	"WT "	305	304	21	0.160714	Nan	0.8	0.0869565	-2.63743	0.177959	Nan	0	-0.321928	0.192453	-3.52356	0.485369	-2.564e-16	0.93969	0.060307	1	2	0.227814	1.87879
"Weber 2010"	20562829	"Snap25"		"synaptosomal-associated protein 25"	"Snap25"	"Snap25 KO + Æaa197_206 (CD9)"	"Snap25 KO + Snap25-WT"	286	280	5	0.0355932	0.445652	Nan	0.0248158	-4.81226	0.339488	-1.16601	0.650809	Nan	0	-5.3326	0.464453	0.77378	0.096461	0.12976	1	1	0.689014	3.50124
"Weber 2010"	20562829	"Snap25"		"synaptosomal-associated protein 25"	"Snap25"	"Snap25 KO + L78A_ L81A_ M202A (Layer +7/+8)"	"Snap25 KO + Snap25-WT"	285	280	107	0.164469	0.590062	0.376299	0.0331484	-2.60412	0.180922	-0.761061	0.451253	-1.41005	0.398081	-4.91492	0.467219	0.45783	0.243	0.29917	1	1	1.06248	1.7653
"Weber 2010"	20562829	"Snap25"		"synaptosomal-associated protein 25"	"Snap25"	"Snap25 KO + L81A_ M202A (Layer +8)"	"Snap25 KO + Snap25-WT"	284	280	72	0.987736	0.775288	0.860534	0.200751	-0.0178021	0.195925	-0.367195	0.358176	-0.216697	0.274366	-2.31652	0.474769	0.4892	0.26002	0.25079	1	1	1.04689	0.246378
"Thakur 2004"	15269257	"Snapin"		"SNAP-associated protein"	"Snapin"	"WT + Snapin s50A (s50A mimics unphosphorylated state of Snapin)"	"WT"	238	237	43	0.885154	1.53191	0.833333	Nan	-0.176	0.304175	0.615336	0.302125	-0.263034	0.625168	Nan	0	0.29525	0.22907	0.47568	1	3	1.05121	0.3995
"Thakur 2004"	15269257	"Snapin"		"SNAP-associated protein"	"Snapin"	"WT + Snapin s50D (s50D mimics phosphorylated state of snapin)"	"WT"	236	235	18	0.891599	0.604167	1.72414	Nan	-0.165533	0.267662	-0.726982	0.312112	0.785875	0.287551	Nan	0	-2.564e-16	0.027919	0.97208	1	3	0.127433	0.625434
"Thakur 2004"	15269257	"Snapin"		"SNAP-associated protein"	"Snapin"	"WT + Snapin"	"WT"	234	233	102	0.632653	0.854167	0.8	Nan	-0.660514	0.317284	-0.22741	0.334312	-0.321928	0.461888	Nan	0	0.65253	0.217	0.13047	1	1	0.875826	0.444084
"Thakur 2004"	15269257	"Snapin"		"SNAP-associated protein"	"Snapin"	"WT + Sp-cAMPS + Snapin"	"WT + Sp-cAMPS"	240	239	109	1.46512	1.22727	1.75	Nan	0.551015	0.319041	0.295456	0.456843	0.807355	0.251576	Nan	0	0.84435	0.057659	0.097993	1	1	0.534991	0.589557
"Gerber 2008"	18703708	"Stx1b"		"syntaxin 1B"	"Stx1"	"open-Stx1B KI on StxA KO background"	"WT Stx1B on StxA KO background"	95	94	39	1.01436	0.638158	2.20225	1.39048	0.0205702	0.11637	-0.648015	0.226025	1.13898	0.0926974	0.475579	0.181385	0	0	1	1	3	5.5262e-11	0.756662
"Toonen 2006"	17110441	"Stxbp1"	"M18-1"	"syntaxin binding protein 1"	"Stxbp"	"M18-1 HET"	"WT"	259	258	37	1.00081	0.632075	Nan	0.788177	0.00116723	0.302319	-0.661831	0.236813	Nan	0	-0.343408	0.341566	0.0014758	0.27501	0.72351	1	3	0.598801	0.467986
"Toonen 2006"	17110441	"Stxbp1"	"M18-1"	"syntaxin binding protein 1"	"Stxbp"	"WT + M18-1"	"WT"	261	260	44	1.17119	1.18182	Nan	1.25263	0.22797	0.225164	0.241008	0.257807	Nan	0	0.324962	0.222773	0.42059	0.30939	0.27002	1	1	1.08076	0.23458
"Weirda 2007"	17442248	"Stxbp1"	"M18-1"	"syntaxin binding protein 1"	"Stxbp"	"M18-1 KO + M18-1 PKCi (M18-1 PKCi has impaired phosphorylation by PKC)"	"M18-1 KO + M18-1 WT"	289	288	57	1.14501	0.8625	0.864198	1.35154	0.195359	0.281683	-0.213404	0.353137	-0.210567	0.366003	0.4346	0.363477	0.49229	0.24209	0.26562	1	1	1.0444	0.206595
"Custer 2006"	16436618	"Sv2a"		"synaptic vesicle glycoprotein 2 a"	"Sv2"	"SV2a/b DKO"	"SV2b KO"	66	65	58	0.627635	0.606687	1.12698	1.01914	-0.672003	0.120637	-0.720976	0.344358	0.172467	0.457483	0.0273505	0.623901	0.053407	0.79775	0.14885	1	2	0.620264	0.577679
"Fernandez-Chacon 2001"	11242035	"Syt1"		"synaptotagmin I"	"Syt"	"Syt-1 R233Q KI (Syt-1 R233Q has decreased Ca affinity)"	"WT (R233Q littermates) "	70	69	104	0.55	1.16	0.336691	1.31579	-0.862496	0.367231	0.214125	0.174118	-1.5705	0.264682	0.395929	0.762973	0.90833	0.031747	0.059923	1	1	0.365524	1.04183
"Fernandez-Chacon 2002"	12351718	"Syt1"		"synaptotagmin I"	"Syt"	"Syt1 D238N KI (Syt1 D238N has reduced Ca affinity)"	"WT (D238N littermates) "	76	75	48	1.05882	0.764294	0.935484	Nan	0.0824622	0.41599	-0.3878	0.378571	-0.0962153	0.276441	Nan	0	0.46462	0.27935	0.25602	1	1	1.06123	0.235547
"Pang 2006"	17135417	"Syt1"		"synaptotagmin I"	"Syt"	"Syt1 D238N KI"	"Syt1 D232N KI"	163	162	41	0.827778	1.48841	0.555556	Nan	-0.272685	0.301757	0.57377	0.320841	-0.847997	0.23594	Nan	0	0.17036	0.0083563	0.82128	1	3	0.503196	0.611737
"Rhee 2005"	16352718	"Syt1"		"synaptotagmin I"	"Syt"	"Syt1 KO + Syt1 C2A3W (Syt1 C2A3W has increased Ca affinity)"	"Syt1 KO + Syt1 WT "	196	195	16	0.821074	0.8	1.48276	1.28125	-0.284417	0.216176	-0.321928	0.296016	0.568284	0.1712	0.357552	0.333894	-1.6392e-17	0.052202	0.9478	1	3	0.204947	0.411289
"Rhee 2005"	16352718	"Syt1"		"synaptotagmin I"	"Syt"	"Syt1 KO + Syt1 C2B3W (Syt1 C2B3W has increased Ca affinity)"	"Syt1 KO + Syt1 WT "	197	195	28	0.864811	0.7	1.81034	1.625	-0.209543	0.173155	-0.514573	0.319314	0.856265	0.222394	0.70044	0.336398	0	0	1	1	3	5.5262e-11	0.589317
"Rhee 2005"	16352718	"Syt1"		"synaptotagmin I"	"Syt"	"Syt1KO + Syt1 C2A3WB3W OE (Syt1 C2A3WB3W has increased Ca affinity)"	"Syt1 KO + Syt1 WT "	198	195	17	0.910537	0.58	2.43103	1.875	-0.135211	0.22117	-0.785875	0.283536	1.28157	0.287361	0.906891	0.267635	0	0	1	1	3	5.5262e-11	0.871456
"Xue 2008b"	18953334	"Syt1"		"synaptotagmin I"	"Syt"	"Syt1 KO + Syt1 R398Q (Syt1 R398Q disrupts Ca-independent bottom face of the C2B domain involved in lipid mixing)"	"Syt1 KO + Syt1 WT"	342	341	27	0.111842	1	0.0962025	Nan	-3.16046	0.382183	0	0.641483	-3.37778	0.333934	Nan	0	0.91747	0.030541	0.051985	1	1	0.339284	2.6707
"Xue 2008b"	18953334	"Syt1"		"synaptotagmin I"	"Syt"	"Syt1 KO + Syt1 R398Q R399Q (Syt1 R398Q R399Q disrupts Ca-independent bottom face of the C2B domain involved in lipid mixing)"	"Syt1 KO + Syt1 WT"	344	341	2	0.149671	1	0.151899	Nan	-2.74013	0.39049	0	0.641483	-2.71882	0.218157	Nan	0	0.92024	0.029743	0.050017	1	1	0.330863	2.22862
"Xue 2008b"	18953334	"Syt1"		"synaptotagmin I"	"Syt"	"Syt1 KO + Syt1 R399Q (Syt1 R399Q disrupts Ca-independent bottom face of the C2B domain involved in lipid mixing)"	"Syt1 KO + Syt1 WT"	343	341	1	0.120066	1	0.134177	Nan	-3.0581	0.414523	0	0.641483	-2.89779	0.235733	Nan	0	0.92202	0.02925	0.048732	1	1	0.325404	2.43236
"Xue 2008b"	18953334	"Syt1"		"synaptotagmin I"	"Syt"	"Syt1 KO"	"Syt1 KO + Syt1 WT"	340	341	30	0.129934	1	0.194937	Nan	-2.94415	0.266806	0	0.641483	-2.35892	0.178608	Nan	0	0.9275	0.028091	0.044408	1	1	0.308457	2.17811
"Augustin 1999"	10440375	"Unc13a"	"Munc13-1"	"unc-13 homolog A"	"Unc13"	"M13-1 KO"	"WT"	11	9	8	0.0769231	0.112	Nan	0.0517241	-3.70044	0.45321	-3.15843	0.600439	Nan	0	-4.27302	0.755287	-4.1778e-34	0.80822	0.19178	1	2	0.488794	3.44013
"Basu 2005"	16228007	"Unc13a"	"Munc13-1"	"unc-13 homolog A"	"Unc13"	"M13-1/2 DKO "	"M13-1/2 DKO + M13-1 WT "	12	13	11	0.0506058	0.0283861	Nan	Nan	-4.30455	0.262953	-5.13867	0.416626	Nan	0	Nan	0	-5.3511e-32	0.89952	0.10048	1	2	0.326136	4.74
"Basu 2005"	16228007	"Unc13a"	"Munc13-1"	"unc-13 homolog A"	"Unc13"	"M13-1/2 DKO + M13-1 MHD1-2 domains (M13 homology domains) "	"M13-1/2 DKO + M13-1 WT "	15	13	24	0.0449038	0.0316302	Nan	Nan	-4.47702	0.362414	-4.98255	0.410228	Nan	0	Nan	0	-1.282e-16	0.88921	0.11079	1	2	0.348164	4.73654
"Basu 2005"	16228007	"Unc13a"	"Munc13-1"	"unc-13 homolog A"	"Unc13"	"M13-1/2 DKO + M13-1 MUN domain (autonomously folded_ alpa-helical module)"	"M13-1/2 DKO + M13-1 WT "	14	13	98	0.283678	0.51176	0.599725	Nan	-1.81767	0.256706	-0.966461	0.458247	-0.737627	0.559476	Nan	0	0.37212	0.35062	0.27726	1	1	1.09099	1.26255
"Basu 2007"	17267576	"Unc13a"	"Munc13-1"	"unc-13 homolog A"	"Unc13"	"M13-1H567K HT / M13-2 KO (M13-1 H567K mimics PDBU activated state)"	"M13-1 WT / M13-2 KO"	17	16	31	0.908475	0.671533	1.63158	2.33333	-0.138482	0.438437	-0.57447	0.315138	0.706269	0.196122	1.22239	0.319583	0.030964	0.030628	0.93841	1	3	0.274015	0.531667
"Basu 2007"	17267576	"Unc13a"	"Munc13-1"	"unc-13 homolog A"	"Unc13"	"M13-1H567K HT / M13-2 KO + 1uM PDBU (M13-1 H567K mimics PDBU activated state)"	"M13-1 WT / M13-2 KO + 1uM PDBU "	22	19	54	Nan	0.687042	1.01695	1.51261	Nan	0	-0.541531	0.363647	0.0242475	0.236593	0.597035	0.155591	0.33021	0.42605	0.24374	1	2	1.07346	0.383304
"Basu 2007"	17267576	"Unc13a"	"Munc13-1"	"unc-13 homolog A"	"Unc13"	"M13-1H567K KI / M13-2 KO (M13-1 H567K mimics PDBU activated state)"	"M13-1 WT / M13-2 KO"	18	16	40	0.894915	0.559611	1.26316	2.66667	-0.160177	0.514209	-0.837505	0.329341	0.337035	0.193691	1.41504	0.317402	0.10341	0.36377	0.53282	1	3	0.937948	0.529359
"Basu 2007"	17267576	"Unc13a"	"Munc13-1"	"unc-13 homolog A"	"Unc13"	"M13-1H567K KI /M13-2 KO + 1uM PDBU (M13-1 H567K mimics PDBU activated state)"	"M13-1 WT / M13-2 KO + 1uM PDBU "	23	19	42	Nan	0.603912	1.02825	1.13445	Nan	0	-0.72759	0.385696	0.0401891	0.278775	0.181998	0.185013	0.22337	0.5515	0.22513	1	2	0.998706	0.515268
"Betz 2001"	11343654	"Unc13a"	"Munc13-1"	"unc-13 homolog A"	"Unc13"	"WT+M13-1(1-451) (M13-1(1-451) is the RIM1-binding N terminus)"	"WT "	29	28	14	0.302083	0.294118	Nan	Nan	-1.72698	0.385783	-1.76553	0.289318	Nan	0	Nan	0	-7.6175e-33	0.87077	0.12923	1	2	0.38492	1.74636
"Rhee 2002"	11792326	"Unc13a"	"Munc13-1"	"unc-13 homolog A"	"Unc13"	"M13-1H567K KI (M13-1H567K mimics PDBU activation)"	"WT"	190	189	25	0.839655	0.557692	1.52174	0.880952	-0.252131	0.219291	-0.842459	0.313288	0.605721	0.166795	-0.182864	0.826371	-3.1114e-17	0.049542	0.95046	1	3	0.197163	0.616497
"Rhee 2002"	11792326	"Unc13a"	"Munc13-1"	"unc-13 homolog A"	"Unc13"	"Munc13-1_2 DKO + Munc13-1 H567K (M13-1H567K mimics PDBU activation)"	"M13-2 KO"	194	193	83	1.14394	Nan	1.36232	Nan	0.194011	0.411385	Nan	0	0.446064	0.175538	Nan	0	0.62527	0.070134	0.30459	1	1	0.842073	0.343958
"Junge 2004"	15294163	"Unc13a/Unc13b"	"Munc13-1/ubMunc13-2"	"unc-13 homolog A/unc-13 homolog B"	"Unc13"	" M13-1_2 DKO + M13 ub13-2"	"M13-1_2 DKO + M13-1 WT"	133	131	46	0.732394	Nan	0.986667	Nan	-0.449307	0.218957	Nan	0	-0.0193653	0.193299	Nan	0	0.41468	0.43547	0.14985	1	2	1.01147	0.318003
"Varoqueaux 2002"	12070347	"Unc13a/Unc13b"	"Munc13-1/Munc13-2"	"unc-13 homolog A/unc-13 homolog B"	"Unc13"	"M13-1_2 DKO"	"WT"	275	273	36	0.0002	0.00425532	Nan	2.63158e-06	-12.2877	1.46104	-7.87652	1.47826	Nan	0	-18.5356	0.26576	0.038714	0.50786	0.45342	1	2	0.828607	10.3205
"Junge 2004"	15294163	"Unc13b"	"Munc13-1/ubMunc13-2"	"unc-13 homolog B"	"Unc13"	" M13-1_2 DKO + M13 W387R (M13 W387R is ubM13-2 with impaired CaM binding)"	" M13-1_2 DKO + M13 ub13-2"	135	133	79	1.33333	Nan	1.10811	Nan	0.415037	0.225821	Nan	0	0.148099	0.211276	Nan	0	0.57606	0.28397	0.13996	1	1	0.950425	0.3116
"Shin 2010"	20154707	"Unc13b"	"ubMunc13-2"	"unc-13 homolog B"	"Unc13"	"M13-1/2 DKO + ubM13-2 DN (impaired Ca-dependent phospholipid binding)"	"M13-1/2 DKO + ubM13-2 WT"	221	220	73	0.925926	0.78187	0.909091	Nan	-0.111031	0.23594	-0.355	0.267253	-0.137504	0.129983	Nan	0	0.50136	0.29288	0.20576	1	1	1.03112	0.228954
"Shin 2010"	20154707	"Unc13b"	"ubMunc13-2"	"unc-13 homolog B"	"Unc13"	"M13-1/2 DKO + ubM13-2 KW (increased PIP2 binding)"	"M13-1/2 DKO + ubM13-2 WT"	222	220	82	1.7037	1.0255	1.71212	Nan	0.768674	0.185873	0.0363215	0.267325	0.775785	0.116246	Nan	0	0.91667	0.03214	0.05119	1	1	0.342391	0.630878

## Sheet: Cadps
General information			Indices			Normalized synaptic parameters				Cluster probabilities				Entropy & RMS
Gene family	Perturbation	Normalized to	Perturbation index	Normalized to index	Index Cooc. matrix	Ap/Ac	RRPp/RRPc	Pv,p/Pv,c	Fp/Fc	P Cl1	P Cl2	P Cl3	Winning Cl	Entropy	RMS
"Cadps"	"CAPS1 KO"	"WT"	104	103	10	0.515152	0.422222	0.824623	0.444444	-7.851e-31	0.93353	0.066471	2	0.244412	0.920228
"Cadps"	"CAPS1_2 DKO"	"WT"	106	103	13	0.272727	0.133333	0.963995	0.2	-2.7562e-31	0.94597	0.05403	2	0.210215	1.9972
"Cadps"	"CAPS2 KO"	"WT"	105	103	9	0.818182	0.866667	1.14983	0.851852	-9.7218e-31	0.2966	0.7034	3	0.607956	0.235941
									m=mean(P):	-6.77633e-31	0.725367	0.274634
						significant	in original paper		ln(m):	#NUM!	-0.321078	-1.29232
						not significant			m*ln(m):	0	-0.232899	-0.354914
									EOM=Entropy of the mean = -sum(m*ln(m)):
									0.587813
									ME=Mean entropy = mean(entropy):
									0.354194
									% of entropy increase after averaging cluster probabilities=100*(EOM/ME-1):
									65.9578

## Sheet: Cplx
General information			Indices			Normalized synaptic parameters				Cluster probabilities				Entropy & RMS
Gene family	Perturbation	Normalized to	Perturbation index	Normalized to index	Index Cooc. matrix	Ap/Ac	RRPp/RRPc	Pv,p/Pv,c	Fp/Fc	P Cl1	P Cl2	P Cl3	Winning Cl	Entropy	RMS
"Cplx"	"Cplx1_2_3 TKO + Cplx1 1-47-dmCplx 54-143"	"Cplx1_2_3 TKO"	370	369	110	Nan	1	0.266727	0.265976	0.8487	0.037392	0.1139	1	0.50955	1.34814
"Cplx"	"Cplx1_2_3 TKO + Cplx1 16-134"	"Cplx1_2_3 TKO + Cplx1 wt"	377	376	103	Nan	1	0.378698	0.12	0.78449	0.043785	0.17172	1	0.629944	0.990571
"Cplx"	"Cplx1_2_3 TKO + Cplx11-15-dmCplx 17-143"	"Cplx1_2_3 TKO"	374	373	120	Nan	1	0.0316456	0.0621762	0.91175	0.031578	0.056672	1	0.356023	3.5227
"Cplx"	"Cplx1_2_3 TKO + Cpx1 (mouse WT cpx1)"	"Cplx1_2_3 TKO"	352	351	101	Nan	1	2.21658	1.51712	0.74748	0.048118	0.20441	1	0.688074	0.811997
"Cplx"	"Cplx1_2_3 TKO + dmCplx 1-76-Cplx3 81-158"	"Cplx1_2_3 TKO"	366	365	100	Nan	1	2.04073	0.969589	0.72711	0.051313	0.22158	1	0.718018	0.727672
"Cplx"	"Cplx1_2_3 TKO + dmCplx 1-83"	"Cplx1_2_3 TKO"	360	359	85	Nan	1	0.701906	1.23077	0.61677	0.10709	0.27615	1	0.892661	0.361084
"Cplx"	"Cplx1_2_3 TKO + dmCplx 17-143"	"Cplx1_2_3 TKO"	372	371	97	Nan	1	0.0361664	0.0587219	0.91167	0.031602	0.056733	1	0.356269	3.38648
"Cplx"	"Cplx1_2_3 TKO + dmCplx 54-143"	"Cplx1_2_3 TKO"	368	367	114	Nan	1	0.483725	1.22625	0.72858	0.051326	0.2201	1	0.716286	0.740864
"Cplx"	"Cplx1_2_3 TKO + dmCplx C140S"	"Cplx1_2_3 TKO"	364	363	92	Nan	1	0.732236	0.783542	0.63473	0.078319	0.28695	1	0.846238	0.317929
"Cplx"	"Cplx1_2_3 TKO + dmCpx (drosphila mutant)"	"Cplx1_2_3 TKO + Cpx1 (mouse WT cpx1)"	347	346	6	0.00963855	1.08311	0.00909091	0.0275482	0.91781	0.029902	0.052288	1	0.337968	5.50301
"Cplx"	"Cplx1_2_3 TKO + dmCpx (drosphila mutant)"	"Cplx1_2_3 TKO"	354	353	121	Nan	1	0.0126904	0.0445205	0.87814	0.045201	0.076663	1	0.450981	4.45486
"Cplx"	"Cplx1_2_3 TKO + dmCpx 1-53-Cplx1 48-70-dmCplx 77-143 "	"Cplx1_2_3 TKO"	358	357	117	Nan	1	0.0169205	0.0376712	0.91194	0.031483	0.056573	1	0.355432	4.16138
"Cplx"	"Cplx1_2_3 TKO + dmCpx K75A_ Y76A"	"Cplx1_2_3 TKO"	356	355	91	Nan	1	0.651438	0.876712	0.64337	0.086228	0.2704	1	0.848716	0.437204
"Cplx"	"Cplx1_2_3 TKO"	"Cplx1_2_3 TKO + Cpx1 (mouse WT cpx1)"	345	346	26	0.373494	1.03485	0.513636	0.603306	0.92624	0.028349	0.045412	1	0.312395	0.990809
"Cplx"	"Cplx1_2_3 TKO"	"Cplx1_2_3 TKO + Cplx1 wt"	375	376	106	Nan	1	0.331361	0.651429	0.81208	0.040881	0.14703	1	0.581614	1.12679
"Cplx"	"Cpx 1_2 DKO "	"Cpx 1_2 DKO + Cpx 1 WT (normalized to WT OE) (imputed for calculations)"	319	313	115	Nan	1	0.550134	Nan	0.70327	0.054987	0.24174	1	0.750304	0.609629
"Cplx"	"Cpx 1_2 DKO + Cpx 1 WT (47-134)"	"Cpx 1_2 DKO + Cpx 1 WT"	312	310	90	Nan	1	0.781457	Nan	0.62667	0.078893	0.29444	1	0.853232	0.251562
"Cplx"	"Cpx 1_2 DKO + Cpx 1 WT"	"Cpx 1_2 DKO"	309	308	7	2.44211	1.16899	1.8	Nan	0.84262	0.066904	0.09048	1	0.542621	0.899835
"Cplx"	"Cpx 1_2 DKO + Cpx 1 WT(47-75) "	"Cpx 1_2 DKO + Cpx 1 WT"	311	310	96	Nan	1	0.675497	Nan	0.65438	0.068294	0.27733	1	0.816486	0.400208
"Cplx"	"Cpx 1_2 DKO + CPX1 (27-134) L41P "	"Cpx 1_2 DKO + Cpx 1 WT (normalized to WT OE) (imputed for calculations)"	321	313	95	Nan	1	0.746381	Nan	0.63609	0.074014	0.2899	1	0.839432	0.298411
"Cplx"	"Cpx 1_2 DKO + CPX1 (41-134) "	"Cpx 1_2 DKO + Cpx 1 WT (normalized to WT OE) (imputed for calculations)"	322	313	93	Nan	1	0.749598	Nan	0.6358	0.073923	0.29027	1	0.839533	0.294023
"Cplx"	"Cpx 1_2 DKO + CPX1 (47-134) "	"Cpx 1_2 DKO + Cpx 1 WT (normalized to WT OE) (imputed for calculations)"	323	313	89	Nan	1	0.801072	Nan	0.62454	0.078337	0.29712	1	0.85409	0.226271
"Cplx"	"Cpx 1_2 DKO + CPX1K69A Y70A "	"Cpx 1_2 DKO + Cpx 1 WT (normalized to WT OE) (imputed for calculations)"	317	313	111	Nan	1	0.532987	Nan	0.70971	0.053945	0.23635	1	0.741788	0.641931
"Cplx"	"Cpx 1_2 DKO + CPX1R48L R59H "	"Cpx 1_2 DKO + Cpx 1 WT (normalized to WT OE) (imputed for calculations)"	316	313	119	Nan	1	0.660779	Nan	0.65961	0.066403	0.27399	1	0.809279	0.42268
"Cplx"	"Cpx 1_2 DKO + CPX1R59H "	"Cpx 1_2 DKO + Cpx 1 WT (normalized to WT OE) (imputed for calculations)"	315	313	86	Nan	1	0.763636	Nan	0.6118	0.1014	0.2868	1	0.890885	0.275094
"Cplx"	"Cpx 1_2 DKO"	"Cpx 2 KO"	308	307	4	0.437788	0.961252	0.542636	Nan	0.91225	0.034854	0.052896	1	0.356257	0.856585
"Cplx"	"Cpx 1_2 DKO"	"Cpx 1_2 DKO + Cpx 1 WT (normalized to WT OE) (imputed for calculations)"	320	313	113	Nan	1	0.56622	Nan	0.69645	0.056416	0.24713	1	0.759592	0.580228
"Cplx"	"Cpx 1_2DKO "	"Cpx 1_2 DKO + Cpx 1 WT (normalized to WT OE) (imputed for calculations)"	318	313	116	Nan	1	0.554805	Nan	0.70134	0.055363	0.24329	1	0.752912	0.601003
"Cplx"	"Cpx I/II DKO"	"Cpx II KO"	187	188	19	0.347826	1.02703	0.468085	0.987013	0.92476	0.029412	0.045826	1	0.31733	1.08353
"Cplx"	"Cpx1_2 DKO"	"Control (Cpx2-/-_ 3+/+_+/-_-/-)"	337	336	34	0.297994	1.02439	0.453052	0.659091	0.92772	0.028197	0.044087	1	0.307846	1.20509
"Cplx"	"Cpx1_2_3 TKO"	"Control (Cpx2-/-_ 3+/+_+/-_-/-)"	339	338	67	0.34957	0.977011	0.464789	0.673469	0.92777	0.02802	0.044215	1	0.307616	1.08355
"Cplx"	"Syt1 KO + Cpx1(27-134) (disrupts Cpx function but not SNARE binding)"	"Syt1 KO + Cpx1 WT "	331	330	105	0.319403	Nan	0.457237	Nan	0.82362	0.075452	0.10092	1	0.58626	1.41169
"Cplx"	"WT + Cpx1(27-134)"	"WT + Cpx1 WT (imputed for calculations)"	325	324	99	Nan	1	0.676364	Nan	0.65564	0.067338	0.27702	1	0.814055	0.398899
"Cplx"	"WT+Cpx1"	"WT+EGFP"	349	348	87	0.79902	0.94686	0.874384	0.905941	0.6192	0.19478	0.18602	1	0.928304	0.222479
"Cplx"	"WT+dmCpx"	"WT+EGFP"	350	348	3	0.151961	0.94686	0.135468	0.143564	0.91945	0.029999	0.050555	1	0.3333	2.28854
									m=mean(P):	0.766101	0.0588428	0.175056
									ln(m):	-0.266441	-2.83289	-1.74265
									m*ln(m):	-0.204121	-0.166695	-0.305061
									EOM=Entropy of the mean = -sum(m*ln(m)):
									0.675877
									ME=Mean entropy = mean(entropy):
									0.628608
									% of entropy increase after averaging cluster probabilities=100*(EOM/ME-1):
									7.51954

## Sheet: Mecp2
General information			Indices			Normalized synaptic parameters				Cluster probabilities				Entropy & RMS
Gene family	Perturbation	Normalized to	Perturbation index	Normalized to index	Index Cooc. matrix	Ap/Ac	RRPp/RRPc	Pv,p/Pv,c	Fp/Fc	P Cl1	P Cl2	P Cl3	Winning Cl	Entropy	RMS
"Mecp2"	"MeCP2 KO"	"WT"	55	54	29	0.545903	0.588511	0.956817	0.624606	1.0806e-33	0.91979	0.080211	2	0.279283	0.671239
"Mecp2"	"Tg1 (MeCP2 KI_ double levels of Mecp2) "	"WT"	57	56	20	2.13777	2.05245	0.94621	1.57143	-7.7023e-33	0.94474	0.055264	2	0.213729	0.872525
									m=mean(P):	-3.31085e-33	0.932265	0.0677375
									ln(m):	#NUM!	-0.0701382	-2.69212
									m*ln(m):	0	-0.0653874	-0.182357
									EOM=Entropy of the mean = -sum(m*ln(m)):
									0.247745
									ME=Mean entropy = mean(entropy):
									0.246506
									% of entropy increase after averaging cluster probabilities=100*(EOM/ME-1):
									0.502427

## Sheet: PDBu
General information			Indices			Normalized synaptic parameters				Cluster probabilities				Entropy & RMS
Gene family	Perturbation	Normalized to	Perturbation index	Normalized to index	Index Cooc. matrix	Ap/Ac	RRPp/RRPc	Pv,p/Pv,c	Fp/Fc	P Cl1	P Cl2	P Cl3	Winning Cl	Entropy	RMS
"PDBu"	"WT + 100-1000nM PBDU"	"before PDBU (imputed for calculations)"	207	205	33	1.99	1.3	Nan	Nan	0.0725	0.45405	0.47345	3	0.902749	0.751286
"PDBu"	"M13-1 WT / M13-2 KO + 1uM PDBU "	"M13-1 WT / M13-2 KO"	19	16	94	Nan	0.995134	1.55263	2.64444	0.69692	0.06776	0.23532	1	0.774505	0.448839
"PDBu"	"M13-1H567K KI / M13-2 KO + 1uM PDBU([M13-1 H567K mimics PDBU activated state)"	"M13-1H567K KI / M13-2 KO (M13-1 H567K mimics PDBU activated state)"	21	18	88	Nan	1.07391	1.26389	1.125	0.62104	0.1453	0.23366	1	0.915831	0.249739
"PDBu"	"M13-1 KO + 100-1000nM PBDU"	"before PDBU (imputed for calculations)"	206	205	81	5.7	1.11	Nan	Nan	0.92009	0.031678	0.04823	1	0.332208	1.77871
									m=mean(P):	0.577638	0.174697	0.247665
									ln(m):	-0.548809	-1.7447	-1.39568
									m*ln(m):	-0.317013	-0.304794	-0.345661
									EOM=Entropy of the mean = -sum(m*ln(m)):
									0.967467
									ME=Mean entropy = mean(entropy):
									0.731323
									% of entropy increase after averaging cluster probabilities=100*(EOM/ME-1):
									32.29

## Sheet: Psen
General information			Indices			Normalized synaptic parameters				Cluster probabilities				Entropy & RMS
Gene family	Perturbation	Normalized to	Perturbation index	Normalized to index	Index Cooc. matrix	Ap/Ac	RRPp/RRPc	Pv,p/Pv,c	Fp/Fc	P Cl1	P Cl2	P Cl3	Winning Cl	Entropy	RMS
"Psen"	" PS1 KI"	"WT "	173	172	45	0.885246	0.653317	1.00236	0.990037	0.37731	0.36757	0.25512	1	1.08414	0.368831
"Psen"	"non functional PS1 KI "	"WT "	174	172	39	0.590164	0.329288	1.04009	0.37609	2.5671e-33	0.89221	0.10779	2	0.34187	1.02475
									m=mean(P):	0.188655	0.62989	0.181455
									ln(m):	-1.66784	-0.46221	-1.70675
									m*ln(m):	-0.314645	-0.291142	-0.309698
									EOM=Entropy of the mean = -sum(m*ln(m)):
									0.915485
									ME=Mean entropy = mean(entropy):
									0.713004
									% of entropy increase after averaging cluster probabilities=100*(EOM/ME-1):
									28.3983

## Sheet: Snap25
General information			Indices			Normalized synaptic parameters				Cluster probabilities				Entropy & RMS
Gene family	Perturbation	Normalized to	Perturbation index	Normalized to index	Index Cooc. matrix	Ap/Ac	RRPp/RRPc	Pv,p/Pv,c	Fp/Fc	P Cl1	P Cl2	P Cl3	Winning Cl	Entropy	RMS
"Snap25"	"Snap25 KO + Æaa197_206 (CD9)"	"Snap25 KO + Snap25-WT"	286	280	5	0.0355932	0.445652	Nan	0.0248158	0.77378	0.096461	0.12976	1	0.689014	3.50124
"Snap25"	"Snap25 KO + L78A_ L81A_ M202A (Layer +7/+8)"	"Snap25 KO + Snap25-WT"	285	280	107	0.164469	0.590062	0.376299	0.0331484	0.45783	0.243	0.29917	1	1.06248	1.7653
"Snap25"	"Snap25 KO + L81A_ M202A (Layer +8)"	"Snap25 KO + Snap25-WT"	284	280	72	0.987736	0.775288	0.860534	0.200751	0.4892	0.26002	0.25079	1	1.04689	0.246378
									m=mean(P):	0.573603	0.199827	0.226573
									ln(m):	-0.555817	-1.6103	-1.48469
									m*ln(m):	-0.318819	-0.321782	-0.33639
									EOM=Entropy of the mean = -sum(m*ln(m)):
									0.976991
									ME=Mean entropy = mean(entropy):
									0.932794
									% of entropy increase after averaging cluster probabilities=100*(EOM/ME-1):
									4.73812

## Sheet: Snapin
General information			Indices			Normalized synaptic parameters				Cluster probabilities				Entropy & RMS
Gene family	Perturbation	Normalized to	Perturbation index	Normalized to index	Index Cooc. matrix	Ap/Ac	RRPp/RRPc	Pv,p/Pv,c	Fp/Fc	P Cl1	P Cl2	P Cl3	Winning Cl	Entropy	RMS
"Snapin"	"WT + Snapin s50A (s50A mimics unphosphorylated state of Snapin)"	"WT"	238	237	43	0.885154	1.53191	0.833333	Nan	0.29525	0.22907	0.47568	3	1.05121	0.3995
"Snapin"	"WT + Snapin s50D (s50D mimics phosphorylated state of snapin)"	"WT"	236	235	18	0.891599	0.604167	1.72414	Nan	-2.564e-16	0.027919	0.97208	3	0.127433	0.625434
"Snapin"	"WT + Snapin"	"WT"	234	233	102	0.632653	0.854167	0.8	Nan	0.65253	0.217	0.13047	1	0.875826	0.444084
"Snapin"	"WT + Sp-cAMPS + Snapin"	"WT + Sp-cAMPS"	240	239	109	1.46512	1.22727	1.75	Nan	0.84435	0.057659	0.097993	1	0.534991	0.589557
									m=mean(P):	0.448032	0.132912	0.419056
						significant	in original paper		ln(m):	-0.80289	-2.01807	-0.869751
						not significant			m*ln(m):	-0.359721	-0.268225	-0.364474
									EOM=Entropy of the mean = -sum(m*ln(m)):
									0.99242
									ME=Mean entropy = mean(entropy):
									0.647364
									% of entropy increase after averaging cluster probabilities=100*(EOM/ME-1):
									53.3017

## Sheet: Stxbp1
General information			Indices			Normalized synaptic parameters				Cluster probabilities				Entropy & RMS
Gene family	Perturbation	Normalized to	Perturbation index	Normalized to index	Index Cooc. matrix	Ap/Ac	RRPp/RRPc	Pv,p/Pv,c	Fp/Fc	P Cl1	P Cl2	P Cl3	Winning Cl	Entropy	RMS
"Stxbp"	"M18-1 HET"	"WT"	259	258	37	1.00081	0.632075	Nan	0.788177	0.0014758	0.27501	0.72351	3	0.598801	0.467986
"Stxbp"	"M18-1 KO + M18-1 PKCi (M18-1 PKCi has impaired phosphorylation by PKC)"	"M18-1 KO + M18-1 WT"	289	288	57	1.14501	0.8625	0.864198	1.35154	0.49229	0.24209	0.26562	1	1.0444	0.206595
"Stxbp"	"WT + M18-1"	"WT"	261	260	44	1.17119	1.18182	Nan	1.25263	0.42059	0.30939	0.27002	1	1.08076	0.23458
									m=mean(P):	0.304785	0.275497	0.419717
						significant	in original paper		ln(m):	-1.18815	-1.28918	-0.868175
						not significant			m*ln(m):	-0.36213	-0.355165	-0.364388
									EOM=Entropy of the mean = -sum(m*ln(m)):
									1.08168
									ME=Mean entropy = mean(entropy):
									0.907987
									% of entropy increase after averaging cluster probabilities=100*(EOM/ME-1):
									19.1297

## Sheet: Syt
General information			Indices			Normalized synaptic parameters				Cluster probabilities				Entropy & RMS
Gene family	Perturbation	Normalized to	Perturbation index	Normalized to index	Index Cooc. matrix	Ap/Ac	RRPp/RRPc	Pv,p/Pv,c	Fp/Fc	P Cl1	P Cl2	P Cl3	Winning Cl	Entropy	RMS
"Syt"	"Syt-1 R233Q KI (Syt-1 R233Q has decreased Ca affinity)"	"WT (R233Q littermates) "	70	69	104	0.55	1.16	0.336691	1.31579	0.90833	0.031747	0.059923	1	0.365524	1.04183
"Syt"	"Syt1 D238N KI (Syt1 D238N has reduced Ca affinity)"	"WT (D238N littermates) "	76	75	48	1.05882	0.764294	0.935484	Nan	0.46462	0.27935	0.25602	1	1.06123	0.235547
"Syt"	"Syt1 D238N KI"	"Syt1 D232N KI"	163	162	41	0.827778	1.48841	0.555556	Nan	0.17036	0.0083563	0.82128	3	0.503196	0.611737
"Syt"	"Syt1 KO + Syt1 C2A3W (Syt1 C2A3W has increased Ca affinity)"	"Syt1 KO + Syt1 WT "	196	195	16	0.821074	0.8	1.48276	1.28125	-1.6392e-17	0.052202	0.9478	3	0.204947	0.411289
"Syt"	"Syt1 KO + Syt1 C2B3W (Syt1 C2B3W has increased Ca affinity)"	"Syt1 KO + Syt1 WT "	197	195	28	0.864811	0.7	1.81034	1.625	0	0	1	3	5.5262e-11	0.589317
"Syt"	"Syt1 KO + Syt1 R398Q (Syt1 R398Q disrupts Ca-independent bottom face of the C2B domain involved in lipid mixing)"	"Syt1 KO + Syt1 WT"	342	341	27	0.111842	1	0.0962025	Nan	0.91747	0.030541	0.051985	1	0.339284	2.6707
"Syt"	"Syt1 KO + Syt1 R398Q R399Q (Syt1 R398Q R399Q disrupts Ca-independent bottom face of the C2B domain involved in lipid mixing)"	"Syt1 KO + Syt1 WT"	344	341	2	0.149671	1	0.151899	Nan	0.92024	0.029743	0.050017	1	0.330863	2.22862
"Syt"	"Syt1 KO + Syt1 R399Q (Syt1 R399Q disrupts Ca-independent bottom face of the C2B domain involved in lipid mixing)"	"Syt1 KO + Syt1 WT"	343	341	1	0.120066	1	0.134177	Nan	0.92202	0.02925	0.048732	1	0.325404	2.43236
"Syt"	"Syt1 KO"	"Syt1 KO + Syt1 WT"	340	341	30	0.129934	1	0.194937	Nan	0.9275	0.028091	0.044408	1	0.308457	2.17811
"Syt"	"Syt1KO + Syt1 C2A3WB3W OE (Syt1 C2A3WB3W has increased Ca affinity)"	"Syt1 KO + Syt1 WT "	198	195	17	0.910537	0.58	2.43103	1.875	0	0	1	3	5.5262e-11	0.871456
									m=mean(P):	0.523054	0.048928	0.428017
						significant	in original paper		ln(m):	-0.648071	-3.0174	-0.848594
						not significant			m*ln(m):	-0.338976	-0.147636	-0.363212
									EOM=Entropy of the mean = -sum(m*ln(m)):
									0.849824
									ME=Mean entropy = mean(entropy):
									0.34389
									% of entropy increase after averaging cluster probabilities=100*(EOM/ME-1):
									147.121

[truncated: 2 more sheets: Unc13, Genes with single perturbations]
